# Supplementary material for: Young People and the Future: School Students’ Concerns and Hopes for the Future after One Year of COVID-19 in Austria—Findings of a Mixed-Methods Pilot Study
Source: MDPI journal article supplement (doi:10.3390/healthcare11162242), 2023-08-09
Supplement: s1 [file s1]

**Suppl. Table S1.** Study sample characteristics (N = 500)

| Variable                                     | <i>n</i> | %    |
|----------------------------------------------|----------|------|
| Gender                                       |          |      |
| Female                                       | 250      | 50.0 |
| Male                                         | 250      | 50.0 |
| Migration background                         |          |      |
| No                                           | 346      | 69.2 |
| Yes                                          | 154      | 30.8 |
| Region                                       |          |      |
| Eastern Austria                              | 277      | 55.4 |
| Southern Austria                             | 100      | 20.0 |
| Western Austria                              | 123      | 24.6 |
| School                                       |          |      |
| College for higher vocational education      | 238      | 47.6 |
| Academic secondary school                    | 222      | 44.4 |
| School for intermediate vocational education | 16       | 3.2  |
| Vocational school                            | 15       | 3.0  |
| Middle school                                | 5        | 1.0  |
| Polytechnical school                         | 4        | 0.8  |

Note: The NUTS 1 classification (Nomenclature of territorial units for statistics) was used for the classification of major socio-economic regions of Austria (Eastern Austria: Burgenland, Lower Austria, Vienna; Southern Austria: Carinthia, Styria; Western Austria: Upper Austria, Salzburg, Tyrol, Vorarlberg)

**Suppl. Table S2.** The greatest concerns about the future. The percentages of respondents reporting each main category (in bold) and subcategory of concerns about the future that emerged from the data for question 1: "What is your greatest concern when you think about the future?".

| <b>Categories</b>                                                             | <b><i>n</i></b> | <b>%</b>     |
|-------------------------------------------------------------------------------|-----------------|--------------|
| <b>School-related concerns about the future</b>                               | <b>135</b>      | <b>27.0%</b> |
| Failing at graduation                                                         | 66              | 13.2%        |
| Academic performance                                                          | 55              | 11.0%        |
| General mentions related to school                                            | 13              | 2.6%         |
| School organization                                                           | 8               | 1.6%         |
| <b>Pandemic-related concerns about the future</b>                             | <b>95</b>       | <b>19.0%</b> |
| Further development of the pandemic                                           | 43              | 8.6%         |
| Continuation of restrictions                                                  | 32              | 6.4%         |
| No return to normality                                                        | 26              | 5.2%         |
| Vaccination                                                                   | 8               | 1.6%         |
| <b>Concerns about a lack of locus of control in the future</b>                | <b>81</b>       | <b>16.2%</b> |
| Fear of failure                                                               | 56              | 11.2%        |
| Uncertainties/Fears                                                           | 14              | 2.8%         |
| Pessimistic outlook                                                           | 9               | 1.8%         |
| Lack of life plans                                                            | 8               | 1.6%         |
| Lack of self-determination                                                    | 2               | 0.4%         |
| <b>Work-related concerns about the future</b>                                 | <b>81</b>       | <b>16.2%</b> |
| Finding a good job                                                            | 34              | 6.8%         |
| Finding a job                                                                 | 28              | 5.6%         |
| Uncertainties regarding further career                                        | 16              | 3.2%         |
| General mentions related to work                                              | 7               | 1.4%         |
| <b>Concerns about the future related to physical and mental health</b>        | <b>64</b>       | <b>12.8%</b> |
| Mental health                                                                 | 31              | 6.2%         |
| Fear to become unhappy                                                        | 18              | 3.6%         |
| Fear of disease                                                               | 13              | 2.6%         |
| Well-being of others                                                          | 7               | 1.4%         |
| <b>Concerns about the future related to social relationships</b>              | <b>47</b>       | <b>9.4%</b>  |
| Fear of being alone                                                           | 37              | 7.4%         |
| Family conflicts                                                              | 7               | 1.4%         |
| Relationship                                                                  | 6               | 1.2%         |
| Starting a family                                                             | 3               | 0.6%         |
| <b>Concerns about the future regarding further education</b>                  | <b>44</b>       | <b>8.8%</b>  |
| Uncertainties regarding education path                                        | 17              | 3.4%         |
| Achievement on the education path                                             | 11              | 2.2%         |
| Access opportunities to further education                                     | 10              | 2.0%         |
| General mentions related to studying                                          | 6               | 1.2%         |
| <b>Concerns about the future related to social and political developments</b> | <b>39</b>       | <b>7.8%</b>  |
| Climate crisis                                                                | 16              | 3.2%         |
| Economic/Financial crisis                                                     | 14              | 2.8%         |
| Political situation                                                           | 14              | 2.8%         |
| Pandemics/Other crises                                                        | 4               | 0.8%         |

|                                                                     |           |             |
|---------------------------------------------------------------------|-----------|-------------|
| <b>Concerns about the future related to the financial situation</b> | <b>34</b> | <b>6.8%</b> |
| <b>Other concerns about the future</b>                              | <b>11</b> | <b>2.2%</b> |
| <b>No concerns about the future/"I don't know"</b>                  | <b>23</b> | <b>4.6%</b> |

*Note:* The percentages of the main categories may differ from the sum of the percentages in the individual subcategories because it may be that a respondent reported experiences in several subcategories (e.g., academic performance and school organization) within one main category (e.g., school-related concerns).

**Suppl. Table S3.** The greatest hopes for the future. The percentages of respondents reporting each main category (in bold) and subcategory of concerns about the hopes for the future that emerged from the data for question 2: "What do you hope for most when you think about the future?".

| <b>Categories</b>                                            | <b><i>n</i></b> | <b>%</b>     |
|--------------------------------------------------------------|-----------------|--------------|
| <b>Pandemic-related hopes for the future</b>                 | <b>181</b>      | <b>36.2%</b> |
| Return to normality                                          | 92              | 18.4%        |
| End of restrictions                                          | 69              | 13.8%        |
| End of the pandemic                                          | 55              | 11.0%        |
| Vaccination                                                  | 7               | 1.4%         |
| Reassurance                                                  | 4               | 0.8%         |
| <b>Hopes for the future regarding major life goals</b>       | <b>142</b>      | <b>28.4%</b> |
| Life satisfaction                                            | 83              | 16.6%        |
| Self-actualization                                           | 40              | 8.0%         |
| Autonomy                                                     | 14              | 2.8%         |
| Personal strength                                            | 11              | 2.2%         |
| Life full of experiences                                     | 5               | 1.0%         |
| <b>Hopes for the future relating to social relationships</b> | <b>95</b>       | <b>19.0%</b> |
| Contacts with friends                                        | 52              | 10.4%        |
| Starting a family                                            | 30              | 6.0%         |
| Good relationship                                            | 17              | 3.4%         |
| Less conflicts in family of origin                           | 12              | 2.4%         |
| <b>Health-related hopes for the future</b>                   | <b>89</b>       | <b>17.8%</b> |
| Well-being                                                   | 34              | 6.8%         |
| Physical health                                              | 32              | 6.4%         |
| Well-being of others                                         | 16              | 3.2%         |
| Fitness                                                      | 11              | 2.2%         |
| Mental health                                                | 6               | 1.2%         |
| <b>School-related hopes for the future</b>                   | <b>71</b>       | <b>14.2%</b> |
| Graduation                                                   | 34              | 6.8%         |
| Academic performance                                         | 18              | 3.6%         |
| School organization                                          | 18              | 3.6%         |
| Less stress at school                                        | 8               | 1.6%         |
| <b>Hopes for the future related to lifestyle</b>             | <b>70</b>       | <b>14.0%</b> |
| Secure financial situation                                   | 38              | 7.6%         |
| Travel abroad                                                | 17              | 3.4%         |
| Living situation                                             | 9               | 1.8%         |
| Stability                                                    | 6               | 1.2%         |
| Driving license/Car                                          | 6               | 1.2%         |
| <b>Work-related hopes for the future</b>                     | <b>54</b>       | <b>10.8%</b> |
| Find a good job                                              | 43              | 8.6%         |
| Find a job                                                   | 6               | 1.2%         |
| Successful career                                            | 5               | 1.0%         |
| <b>Hopes for the future regarding further education</b>      | <b>34</b>       | <b>6.8%</b>  |
| General mentions of further education                        | 17              | 3.4%         |
| Vocational aspirations                                       | 12              | 2.4%         |

|                                                                          |           |             |
|--------------------------------------------------------------------------|-----------|-------------|
| Academic success                                                         | 5         | 1.0%        |
| <b>Hopes for the future related to social and political developments</b> | <b>29</b> | <b>5.8%</b> |
| Social developments                                                      | 16        | 3.2%        |
| Political developments                                                   | 6         | 1.2%        |
| Recognition of climate change                                            | 6         | 1.2%        |
| Economic developments                                                    | 2         | 0.4%        |
| No other crisis                                                          | 2         | 0.4%        |
| <b>Other hopes for the future</b>                                        | <b>11</b> | <b>2.2%</b> |
| <b>No hopes for the future/"I don't know"</b>                            | <b>9</b>  | <b>1.8%</b> |

*Note:* The percentages of the main categories may differ from the sum of the percentages in the individual subcategories because it may be that a respondent reported experiences in several subcategories (e.g., graduation and academic performance) within one main category (e.g., school-related hopes).

**Suppl. Table S4.** Proportion of female and male students differing in reportings in main or subcategories of  
1) Concerns about the future and 2) Hopes for the future ( $N = 500$ )

| Category                                  | Gender                      |                           | Statistics |                        |
|-------------------------------------------|-----------------------------|---------------------------|------------|------------------------|
|                                           | Female<br>( <i>n</i> = 250) | Male<br>( <i>n</i> = 250) |            |                        |
| 1) <u>Concerns about the future:</u>      |                             |                           |            |                        |
| No return to normality                    | %                           | 7.6                       | 2.8        | $\chi^2(1) = 5.842$ ;  |
|                                           | <i>n</i>                    | 19                        | 7          | $p = 0.016$            |
| Access opportunities to further education | %                           | 3.6                       | 0.4        | $p = 0.020$            |
|                                           | <i>n</i>                    | 9                         | 1          |                        |
| <b>Lack of locus of control</b>           | %                           | 21.6                      | 10.8       | $\chi^2(1) = 10.740$ ; |
|                                           | <i>n</i>                    | 54                        | 27         | $p = 0.001$            |
| Fear of failure                           | %                           | 15.6                      | 6.8        | $\chi^2(1) = 9.733$ ;  |
|                                           | <i>n</i>                    | 39                        | 17         | $p = 0.002$            |
| <b>Physical and mental health</b>         | %                           | 17.2                      | 8.4        | $\chi^2(1) = 8.673$ ;  |
|                                           | <i>n</i>                    | 43                        | 21         | $p = 0.003$            |
| Mental health                             | %                           | 8.8                       | 3.6        | $\chi^2(1) = 5.812$ ;  |
|                                           | <i>n</i>                    | 22                        | 9          | $p = 0.016$            |
| Fear to become unhappy                    | %                           | 6.0                       | 1.2        | $p = 0.007$            |
|                                           | <i>n</i>                    | 15                        | 3          |                        |
| <b>Social and political developments</b>  | %                           | 4.8                       | 10.8       | $\chi^2(1) = 6.257$ ;  |
|                                           | <i>n</i>                    | 12                        | 27         | $p = 0.012$            |
| No concerns about the future              | %                           | 1.6                       | 5.6        | $p = 0.028$            |
|                                           | <i>n</i>                    | 4                         | 14         |                        |
| 2) <u>Hopes for the future:</u>           |                             |                           |            |                        |
| Life as before the pandemic               | %                           | 22.8                      | 14.0       | $\chi^2(1) = 6.447$ ;  |
|                                           | <i>n</i>                    | 57                        | 35         | $p = 0.011$            |
| <b>Major life goals</b>                   | %                           | 33.6                      | 23.2       | $\chi^2(1) = 6.649$ ;  |
|                                           | <i>n</i>                    | 84                        | 58         | $p = 0.010$            |
| Life satisfaction                         | %                           | 22.8                      | 10.4       | $\chi^2(1) = 13.883$ ; |
|                                           | <i>n</i>                    | 57                        | 26         | $p < 0.001$            |

$p$ :  $p$ -values (2-tailed);  $\chi^2$ : Chi-squared-test. The main categories are in bold.

**Suppl. Table S5.** Proportion of students with and without migration background differing in reportings in main or subcategories of 1) Concerns about the future and 2) Hopes for the future ( $N = 500$ )

| Category                                          | Migration background     |                         | Statistics |                        |
|---------------------------------------------------|--------------------------|-------------------------|------------|------------------------|
|                                                   | yes<br>( <i>n</i> = 154) | no<br>( <i>n</i> = 346) |            |                        |
| 1) <u>Concerns about the future:</u>              |                          |                         |            |                        |
| <b>Pandemic-related concerns about the future</b> | %                        | 13.6                    | 21.4       | $\chi^2(1) = 4.160$ ;  |
|                                                   | <i>n</i>                 | 21                      | 74         | $p = 0.041$            |
| <b>Lack of locus of control</b>                   | %                        | 23.4                    | 13.0       | $\chi^2(1) = 8.443$ ;  |
|                                                   | <i>n</i>                 | 36                      | 45         | $p = 0.004$            |
| Fear of failure                                   | %                        | 18.8                    | 7.8        | $\chi^2(1) = 13.031$ ; |
|                                                   | <i>n</i>                 | 29                      | 27         | $p < 0.001$            |
| <b>Social and political developments</b>          | %                        | 3.9                     | 9.5        | $\chi^2(1) = 4.716$ ;  |
|                                                   | <i>n</i>                 | 6                       | 33         | $p = 0.030$            |
| 2) <u>Hopes for the future:</u>                   |                          |                         |            |                        |
| <b>Pandemic-related hopes for the future</b>      | %                        | 29.9                    | 39.0       | $\chi^2(1) = 3.861$ ;  |
|                                                   | <i>n</i>                 | 46                      | 135        | $p = 0.049$            |
| End of restrictions                               | %                        | 7.1                     | 16.8       | $\chi^2(1) = 8.291$ ;  |
|                                                   | <i>n</i>                 | 11                      | 58         | $p = 0.004$            |
| Well-being of others                              | %                        | 6.5                     | 1.7        | $\chi^2(1) = 7.793$ ;  |
|                                                   | <i>n</i>                 | 10                      | 6          | $p = 0.005$            |

$p$ :  $p$ -values (2-tailed);  $\chi^2$ : Chi-squared-test. The main categories are in bold.

**Suppl. Table S6.** Proportion of students with and without psychological distress differing in reportings in main or subcategories of 1) Concerns about the future and 2) Hopes for the future ( $N = 500$ )

| Category                                    | Psychological distress |                   |      | Statistics             |
|---------------------------------------------|------------------------|-------------------|------|------------------------|
|                                             | yes                    | no                |      |                        |
|                                             | ( <i>n</i> = 310)      | ( <i>n</i> = 190) |      |                        |
| 1) <u>Concerns about the future:</u>        |                        |                   |      |                        |
| Vaccination                                 | %                      | 0.3               | 3.7  | <i>p</i> = 0.006       |
|                                             | <i>n</i>               | 1                 | 7    |                        |
| School-related concerns about the future    | %                      | 31.6              | 19.5 | $\chi^2(1) = 8.807$ ;  |
|                                             | <i>n</i>               | 98                | 37   | <i>p</i> = 0.003       |
| Failing at graduation                       | %                      | 16.5              | 7.9  | $\chi^2(1) = 7.528$ ;  |
|                                             | <i>n</i>               | 51                | 15   | <i>p</i> = 0.006       |
| Fear of failure                             | %                      | 13.5              | 7.4  | $\chi^2(1) = 4.524$ ;  |
|                                             | <i>n</i>               | 42                | 14   | <i>p</i> = 0.033       |
| Physical and mental health                  | %                      | 15.8              | 7.9  | $\chi^2(1) = 6.606$ ;  |
|                                             | <i>n</i>               | 49                | 15   | <i>p</i> = 0.010       |
| Mental health                               | %                      | 8.1               | 3.2  | $\chi^2(1) = 4.877$ ;  |
|                                             | <i>n</i>               | 25                | 6    | <i>p</i> = 0.027       |
| No concerns about the future/"I don't know" | %                      | 2.3               | 8.4  | $\chi^2(1) = 10.196$ ; |
|                                             | <i>n</i>               | 7                 | 16   | <i>p</i> = 0.001       |
| No concerns about the future                | %                      | 1.6               | 6.8  | $\chi^2(1) = 9.282$ ;  |
|                                             | <i>n</i>               | 5                 | 13   | <i>p</i> = 0.002       |
| 2) <u>Hopes for the future:</u>             |                        |                   |      |                        |
| Major life goals                            | %                      | 31.6              | 23.2 | $\chi^2(1) = 4.141$ ;  |
|                                             | <i>n</i>               | 98                | 44   | <i>p</i> = 0.042       |
| Life satisfaction                           | %                      | 19.4              | 12.1 | $\chi^2(1) = 4.472$ ;  |
|                                             | <i>n</i>               | 60                | 23   | <i>p</i> = 0.034       |
| Social developments                         | %                      | 1.9               | 5.3  | $\chi^2(1) = 4.211$ ;  |
|                                             | <i>n</i>               | 6                 | 10   | <i>p</i> = 0.040       |

$p$ :  $p$ -values (2-tailed);  $\chi^2$ : Chi-squared-test. The main categories are in bold.
